# Supplementary material for: Emission characteristics of reactive organic gases from industrial volatile chemical products (VCPs) in China
Source: Copernicus journal article supplement (doi:10.5194/egusphere-2024-380), 2024-02-13
Supplement: Supplementary file [file egusphere-2024-380-AC2-supplement.pdf]

## Response to Reviewer #2's comments

*This work investigated the emissions of ROGs from five industrial VCP sources in China, including shoemaking, plastic surface coating, furniture coating and shipping coating industries. PTR-ToF-MS and GC-MS/FID are combined together to develop comprehensive speciation of VOC from these industrial sources in PRD, China. The manuscript is generally well organized. Some statements are unclear and need to be clarified. I also suggest authors polish English and grammar throughout the manuscript. Please see below for my detailed comments.*

Reply: We would like to thank you for your insightful comments, which helped us tremendously in improving the quality of our work. We have checked the grammar and syntax throughout the manuscript and the supplement. Please find our responses to individual comments below.

*1.Abstract: This work is only for PRD, China, instead of the whole nation. Please clarify this in the title and abstract to avoid misunderstanding.*

Reply: Thanks for your suggestion. We have modified this description in the title and abstract.

The title in the revised manuscript is modified to:

**Emission characteristics of reactive organic gases from industrial volatile chemical products (VCPs) in the Pearl River Delta (PRD), China**

The sentence in the Abstract (line 21-24) is modified to:

**This study aimed to investigate the emissions of ROGs from five industrial VCP sources in the Pearl River Delta (PRD) region of China, including shoemaking, plastic surface coating, furniture coating, printing, and ship coating industries.**

*2.Line 30: Not sure what this sentence means. Please keep in mind that this study doesn't cover all emission sources. Please clarify this sentence to avoid misunderstanding.*

Reply: Thanks for your suggestion. We have modified this description here.

The sentence in the Abstract (line 30-32) is modified to:

32 **Moreover, mass spectra similarity analysis revealed significant**  
33 **dissimilarities among the ROG emission from industrial activities, indicating**  
34 **substantial variations between different industrial VCP sources.**

35  
36 *3.Line 32: so, what's the proportion of OVOCs for ship coating industry then? Does it*  
37 *make big difference using solvent-borne coatings or waterborne coatings for OVOC*  
38 *proportion?*

39 **Reply: Thanks for your suggestion. There is a significant difference in the**  
40 **proportion of OVOCs between solvent-borne coatings and water-borne coatings. We**  
41 **have included additional descriptions regarding the proportion of OVOCs in the ship**  
42 **coating industry.**

43 **The sentence in the Abstract (line 32-36) is modified to:**

44 **Except for the ship coating industry utilizing solvent-borne coatings, the**  
45 **proportions of OVOCs range from 67% to 96% in total ROG emissions and 72%**  
46 **to 97% in total OH reactivity (OHR) for different industrial sources, while the**  
47 **corresponding contributions of OVOCs in the ship coating industry are only**  
48 **16%±3.5% and 15%±3.6%.**

49  
50 *4.Line 37-39: please improve the statement.*

51 **Reply: Thanks for your suggestion. We have re-wording this sentence.**

52 **The sentence in the Abstract (line 39-41) is modified to:**

53 **We find that a few species can contribute the majority of the ROG emissions,**  
54 **and also their OHR and OFP from various industrial VCP sources.**

55  
56 *5.Line 41: Why is the treatment efficiency negative?*

57 **Reply: Thanks for your suggestion. The negative treatment efficiency of ROG**  
58 **was obtained in the furniture coating industry, as shown in the discussion in Section**  
59 **3.3. This treatment device demonstrates inefficiency for all ROG groups. The**  
60 **inadequate performance of the ROG treatment devices in this specific facility may be**

61 attributed to a number of possible reasons, e.g., delayed replacement of activated carbon  
62 and other adsorption materials, and the implementation of the UV photolysis device  
63 could potentially result in the generation of more ROGs as byproducts.

64

65 *6.Line 74: Not accurate statement. The substitution of solvent-borne VCPs by water-*  
66 *borne ones are for several sources., e.g., interior wall painting.*

67 Reply: Thanks for your suggestion. The substitution of solvent-borne VCPs by  
68 water-borne VCPs are not for all of industrial VCP sources. We have revised  
69 descriptions here.

70 The sentences in the Introduction (line 74-81) are modified to:

71 **To mitigate the emissions of most primary pollutants, stricter emission**  
72 **standards have been implemented along with advancements in ROG treatment**  
73 **technologies in China. Specifically, water-borne VCPs has substituted solvent-**  
74 **borne VCPs in several industries, such as printing, interior wall coating, and**  
75 **automotive manufacturing. However, the replacement in steel structures,**  
76 **automotive plastic parts manufacturing and ship building industries remains**  
77 **below 3% (Mo et al., 2021;Li et al., 2019;Shi et al., 2023;Wang et al., 2023).**

78

79 *7.Line 159: I'm curious how to combine PTR-ToF-MS with GC-MS/FID measurements*  
80 *when they overlap? How to handle the un-known species?*

81 Reply: Thanks for your suggestion. Careful consideration should be given to the  
82 overlap of ROG species in the combined measurements of PTR-ToF-MS and GC-  
83 MS/FID, to make sure that each species should only be considered once. Species that  
84 are not calibrated were semi-quantified using methods based on the kinetics of proton-  
85 transfer reactions of  $\text{H}_3\text{O}^+$  with ROGs (Fig. S2). We have added some description about  
86 these in Section S2 in the Supplement.

87 The sentence in the Section 2.1 (line 180-181) is modified to:

88 **The selection of overlapping ROGs was similar to a previous study (Table.**  
89 **S2).**

90 The sentences in the Section S2 in the Supplement (line 85-92) are modified to:

91 **In this study, a more comprehensive speciation of ROGs was achieved by**  
92 **the combination of GC-MS/FID and PTR-ToF-MS, the same ROG species from**  
93 **the combination measurement should be counted only once. All ROG species**  
94 **detected in this study is summarized in Table S2. Specifically, to facilitate**  
95 **comparison with traditional photochemical assessment monitoring stations**  
96 **(PAMS) species, C<sub>6</sub>-C<sub>10</sub> aromatics were identified using GC/MS-FID, while C<sub>10</sub>-**  
97 **C<sub>12</sub> alkanes were detected using NO<sup>+</sup> PTR-ToF-MS, as GC-MS/FID only**  
98 **containing the n-alkanes. For unknown ROG species, we used the semi-quantity**  
99 **based on the methods.**

100

101 **Table S2. Detailed information of ROG species measured by different instruments.**

102

| <b>Components</b>                       | <b>Measurements</b>                   | <b>ROG species</b>                                                                                         |
|-----------------------------------------|---------------------------------------|------------------------------------------------------------------------------------------------------------|
| <b>OVOCs</b>                            | <b>PTR-H<sub>3</sub>O<sup>+</sup></b> | <b>formula only including CHO</b>                                                                          |
| <b>N/S-containing</b>                   | <b>PTR-H<sub>3</sub>O<sup>+</sup></b> | <b>formula including CHN, CHS, CHON, CHOS, and CHONS</b>                                                   |
| <b>Heavy aromatics and monoterpenes</b> | <b>PTR-H<sub>3</sub>O<sup>+</sup></b> | <b>monoterpenes, C<sub>11</sub>-C<sub>20</sub> aromatics, and polynuclear aromatic hydrocarbons (PAHs)</b> |
| <b>Higher alkanes</b>                   | <b>PTR-NO<sup>+</sup></b>             | <b>C<sub>10</sub>-C<sub>20</sub> acyclic, cyclic and bicyclic alkanes</b>                                  |
| <b>Alkanes</b>                          | <b>GC-MS/FID</b>                      | <b>C<sub>2</sub>-C<sub>9</sub> alkanes</b>                                                                 |
| <b>Alkenes</b>                          | <b>GC-MS/FID</b>                      | <b>C<sub>2</sub>-C<sub>6</sub> alkenes</b>                                                                 |
| <b>Aromatics</b>                        | <b>GC-MS/FID</b>                      | <b>C<sub>6</sub>-C<sub>10</sub> aromatics</b>                                                              |
| <b>Halohydrocarbons</b>                 | <b>GC-MS/FID</b>                      | <b>C<sub>1</sub>-C<sub>6</sub> halohydrocarbons</b>                                                        |

103

104 *8.Line 299: have you found any additional important OVOCs using PTR-ToF-MS?*

105 *Please list them or at list some examples here.*

106 **Reply:** Thanks for your suggestion. In the Introduction, we have discussed the  
107 utilization of PTR-ToF-MS to enhance the characterization of OVOC emissions from  
108 industrial VCPs. In addition, some OVOCs with high concentrations (i.e. acetates and

109 acrylates) have been listed in the line 317-320 in the revised manuscript (line 294-296  
110 in the original manuscript), which were seldom reported in previous studies.

111         Considering that this sentence seem to be abrupt here, we removed it in the  
112 revised manuscript.

113

114

115

116 **Reference:**

- 117 Acton, W. J. F., Schallhart, S., Langford, B., Valach, A., Rantala, P., Fares, S., Carriero,  
118 G., Tillmann, R., Tomlinson, S. J., Dragosits, U., Gianelle, D., Hewitt, C. N., and  
119 Nemitz, E.: Canopy-scale flux measurements and bottom-up emission estimates of  
120 volatile organic compounds from a mixed oak and hornbeam forest in northern Italy,  
121 *Atmospheric Chemistry and Physics*, 16, 7149-7170, 10.5194/acp-16-7149-2016, 2016.
- 122 Carter, W. P.: Development of the SAPRC-07 chemical mechanism and updated ozone  
123 reactivity scales, Citeseer, 2007.
- 124 Coggon, M. M., Stockwell, C. E., Claflin, M. S., Pfannerstill, E. Y., Xu, L., Gilman, J.  
125 B., Marcantonio, J., Cao, C., Bates, K., Gkatzelis, G. I., Lamplugh, A., Katz, E. F., Arata,  
126 C., Apel, E. C., Hornbrook, R. S., Piel, F., Majluf, F., Blake, D. R., Wisthaler, A.,  
127 Canagaratna, M., Lerner, B. M., Goldstein, A. H., Mak, J. E., and Warneke, C.:  
128 Identifying and correcting interferences to PTR-ToF-MS measurements of isoprene and  
129 other urban volatile organic compounds, *Atmospheric Measurement Techniques*, 17,  
130 801-825, 10.5194/amt-17-801-2024, 2024.
- 131 He, X., Yuan, B., Wu, C., Wang, S., Wang, C., Huangfu, Y., Qi, J., Ma, N., Xu, W.,  
132 Wang, M., Chen, W., Su, H., Cheng, Y., and Shao, M.: Volatile organic compounds in  
133 wintertime North China Plain: Insights from measurements of proton transfer reaction  
134 time-of-flight mass spectrometer (PTR-ToF-MS), *Journal of Environmental Sciences*,  
135 10.1016/j.jes.2021.08.010, 2022.
- 136 Kamal, M. S., Razzak, S. A., and Hossain, M. M.: Catalytic oxidation of volatile organic  
137 compounds (VOCs) – A review, *Atmospheric Environment*, 140, 117-134,  
138 10.1016/j.atmosenv.2016.05.031, 2016.
- 139 Li, M., Zhang, Q., Zheng, B., Tong, D., Lei, Y., Liu, F., Hong, C. P., Kang, S. C., Yan,  
140 L., Zhang, Y. X., Bo, Y., Su, H., Cheng, Y. F., and He, K. B.: Persistent growth of  
141 anthropogenic non-methane volatile organic compound (NMVOC) emissions in China  
142 during 1990–2017: drivers, speciation and ozone formation potential, *Atmospheric*  
143 *Chemistry and Physics*, 19, 8897-8913, 10.5194/acp-19-8897-2019, 2019.
- 144 Li, X.-B., Zhang, C., Liu, A., Yuan, B., Yang, H., Liu, C., Wang, S., Huangfu, Y., Qi, J.,  
145 Liu, Z., He, X., Song, X., Chen, Y., Peng, Y., Zhang, X., Zheng, E., Yang, L., Yang, Q.,  
146 Qin, G., Zhou, J., and Shao, M.: Assessment of long tubing in measuring atmospheric  
147 trace gases: applications on tall towers, *Environmental Science: Atmospheres*,  
148 10.1039/d2ea00110a, 2023.
- 149 Mo, Z., Cui, R., Yuan, B., Cai, H., McDonald, B. C., Li, M., Zheng, J., and Shao, M.:  
150 A mass-balance-based emission inventory of non-methane volatile organic compounds  
151 (NMVOCs) for solvent use in China, *Atmospheric Chemistry and Physics*, 21, 13655-  
152 13666, 10.5194/acp-21-13655-2021, 2021.
- 153 Na, K., and Pyo Kim, Y.: Chemical mass balance receptor model applied to ambient  
154 C<sub>2</sub>–C<sub>9</sub> VOC concentration in Seoul, Korea: Effect of chemical reaction losses,  
155 *Atmospheric Environment*, 41, 6715-6728,  
156 <https://doi.org/10.1016/j.atmosenv.2007.04.054>, 2007.
- 157 Seco, R., Peñuelas, J., Filella, I., Llusà, J., Molowny-Horas, R., Schallhart, S., Metzger,

158 A., Müller, M., and Hansel, A.: Contrasting winter and summer VOC mixing ratios at  
159 a forest site in the Western Mediterranean Basin: the effect of local biogenic emissions,  
160 Atmospheric Chemistry and Physics, 11, 13161-13179, 10.5194/acp-11-13161-2011,  
161 2011.

162 Shi, Y., Xi, Z., Lv, D., Simayi, M., Liang, Y., Ren, J., and Xie, S.: Sector-based volatile  
163 organic compound emission characteristics and reduction perspectives for coating  
164 materials manufacturing in China, Journal of Cleaner Production, 394,  
165 10.1016/j.jclepro.2023.136407, 2023.

166 Tan, Y., Han, S., Chen, Y., Zhang, Z., Li, H., Li, W., Yuan, Q., Li, X., Wang, T., and Lee,  
167 S.-c.: Characteristics and source apportionment of volatile organic compounds (VOCs)  
168 at a coastal site in Hong Kong, Science of The Total Environment, 777,  
169 10.1016/j.scitotenv.2021.146241, 2021.

170 Wang, C., Yuan, B., Wu, C., Wang, S., Qi, J., Wang, B., Wang, Z., Hu, W., Chen, W.,  
171 Ye, C., Wang, W., Sun, Y., Wang, C., Huang, S., Song, W., Wang, X., Yang, S., Zhang,  
172 S., Xu, W., Ma, N., Zhang, Z., Jiang, B., Su, H., Cheng, Y., Wang, X., and Shao, M.:  
173 Measurements of higher alkanes using  $\text{NO}^+$  chemical ionization in PTR-ToF-MS:  
174 important contributions of higher alkanes to secondary organic aerosols in China,  
175 Atmospheric Chemistry and Physics, 20, 14123-14138, 10.5194/acp-20-14123-2020,  
176 2020.

177 Wang, H., Sun, S., Nie, L., Zhang, Z., Li, W., and Hao, Z.: A review of whole-process  
178 control of industrial volatile organic compounds in China, Journal of Environmental  
179 Sciences, 123, 127-139, 10.1016/j.jes.2022.02.037, 2023.

180 Wu, C., Wang, C., Wang, S., Wang, W., Yuan, B., Qi, J., Wang, B., Wang, H., Wang, C.,  
181 Song, W., Wang, X., Hu, W., Lou, S., Ye, C., Peng, Y., Wang, Z., Huangfu, Y., Xie, Y.,  
182 Zhu, M., Zheng, J., Wang, X., Jiang, B., Zhang, Z., and Shao, M.: Measurement report:  
183 Important contributions of oxygenated compounds to emissions and chemistry of  
184 volatile organic compounds in urban air, Atmospheric Chemistry and Physics, 20,  
185 14769-14785, 10.5194/acp-20-14769-2020, 2020.

186 Yuan, B., Shao, M., Lu, S., and Wang, B.: Source profiles of volatile organic compounds  
187 associated with solvent use in Beijing, China, Atmospheric Environment, 44, 1919-  
188 1926, 10.1016/j.atmosenv.2010.02.014, 2010.

189 Yuan, B., Shao, M., Gouw, J. D., Parrish, D. D., Lu, S., Wang, M., Zeng, L., Zhang, Q.,  
190 Song, Y., and Zhang, J.: Volatile organic compounds (VOCs) in urban air: How  
191 chemistry affects the interpretation of positive matrix factorization (PMF) analysis,  
192 Journal of Geophysical Research Atmospheres, 117, 24302, 2012.

193 Zheng, J., Yu, Y., Mo, Z., Zhang, Z., Wang, X., Yin, S., Peng, K., Yang, Y., Feng, X.,  
194 and Cai, H.: Industrial sector-based volatile organic compound (VOC) source profiles  
195 measured in manufacturing facilities in the Pearl River Delta, China, Sci Total Environ,  
196 456-457, 127-136, 10.1016/j.scitotenv.2013.03.055, 2013.

197
